# Supplementary material for: Complex regulation of microRNAs in roots of competitively-grown isogenic Nicotiana attenuata plants with different capacities to interact with arbuscular mycorrhizal fungi
Source: PubMed Central journal article supplement (PMC6296096; doi:10.1186/s12864-018-5338-x), 2018-12-17

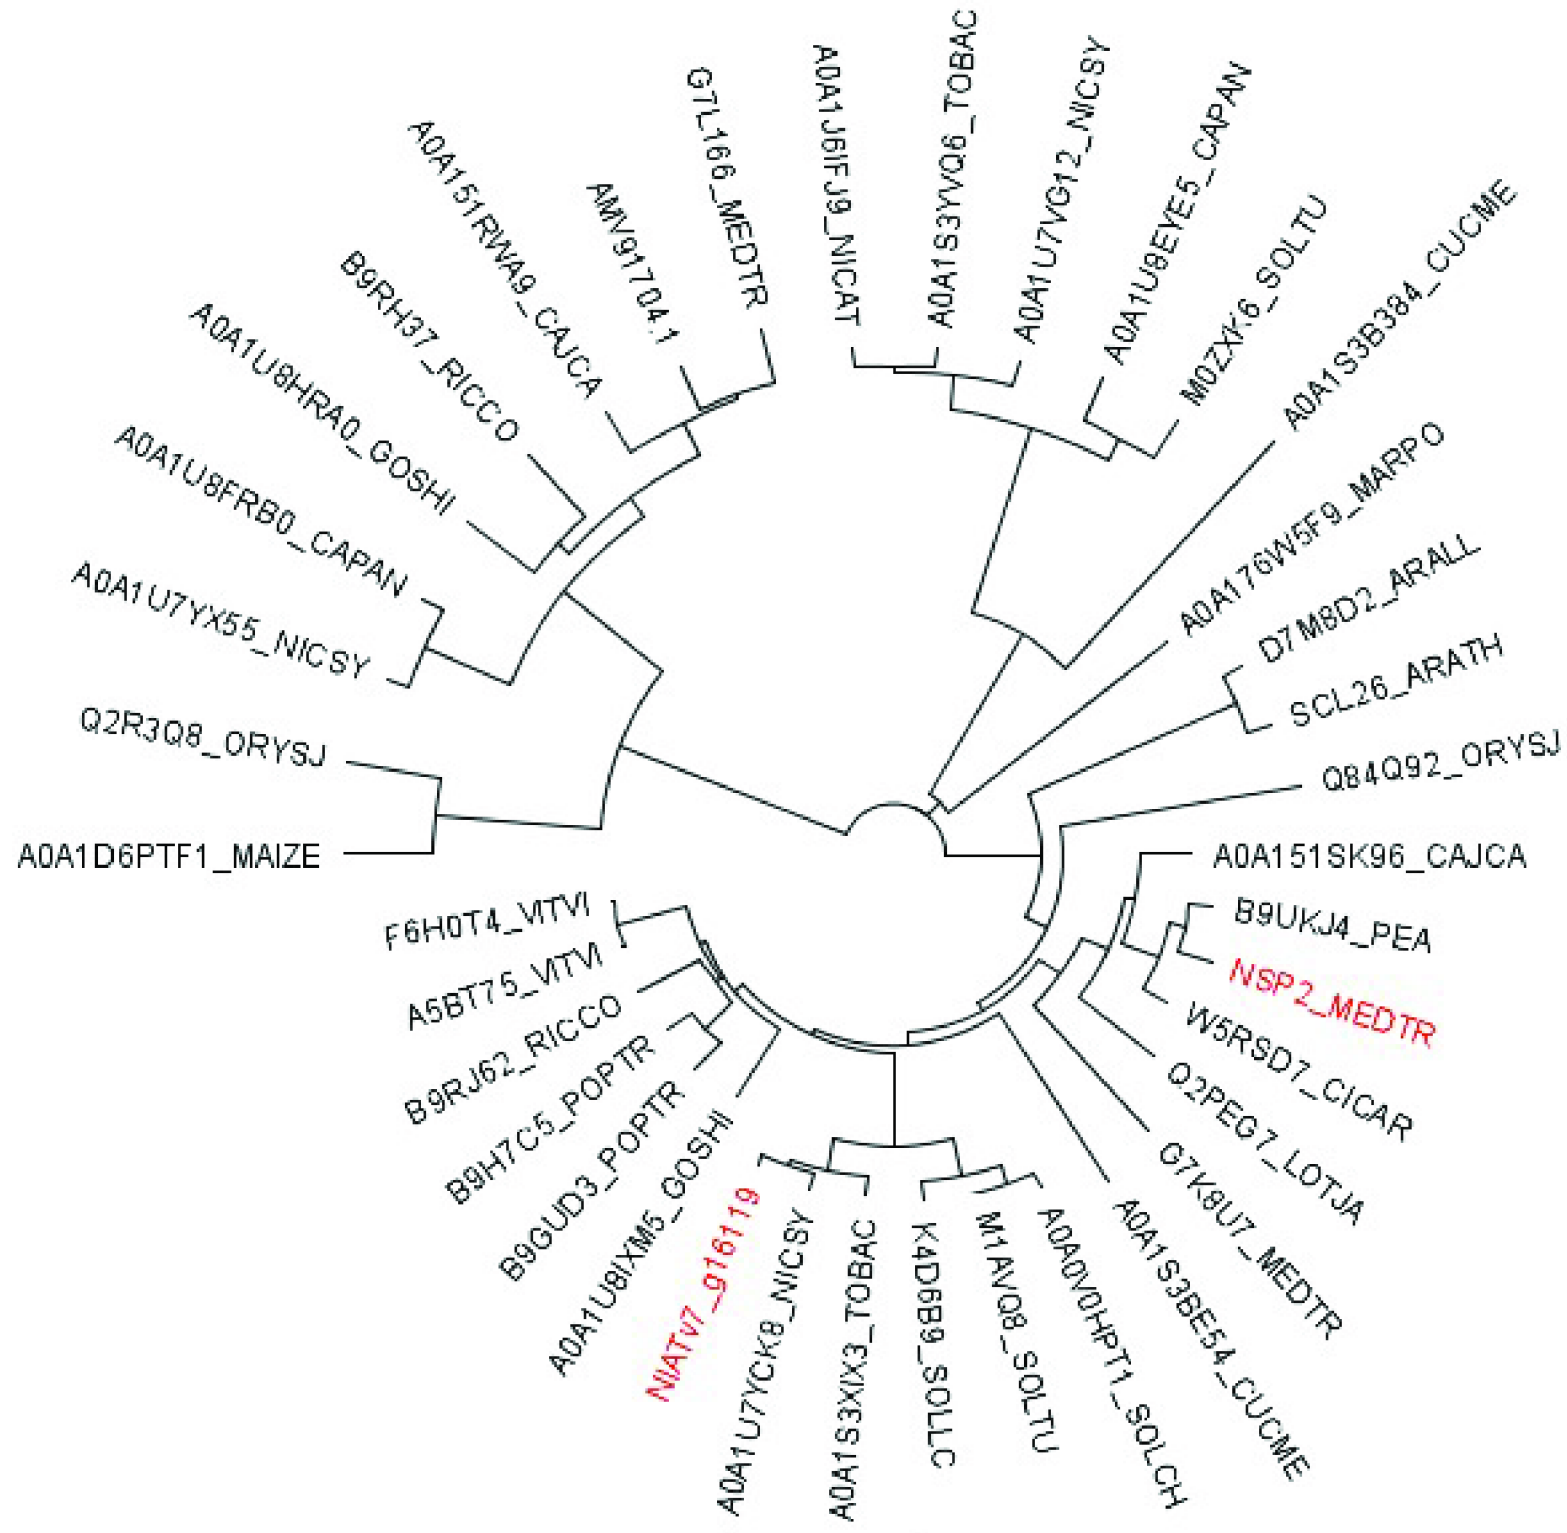

Supplement: 12864_2018_5338_MOESM6_ESM.pdf [file 12864_2018_5338_MOESM6_ESM.pdf]
